# Supplementary material
Source: publisher site journal article supplement (https://www.spandidos-publications.com/3868/downloadSupplementary)

Figure S1. Transfection efficiency of PINCH1 OE in HL-1 cells. (A) Western blotting and (B) reverse transcription-quantitative PCR were performed to assess the transfection efficiency of PINCH1 OE. PINCH1, particularly interesting new cysteine histidine rich 1; OE, overexpression; NC, negative control.

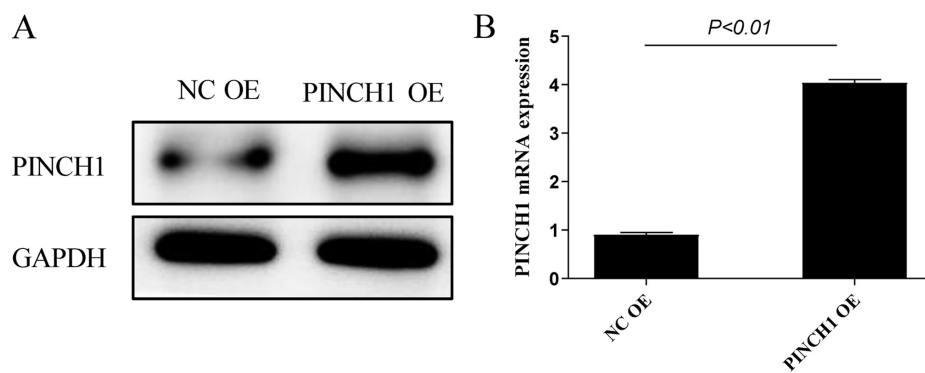

Supplement: Supplementary file 1 [file downloadSupplementary]
